# Supplementary material
Source: PubMed Central journal article supplement (PMC3653556)
Supplement: supp_140.11.2334_DEV094748.pdf [file supp_140.11.2334_DEV094748.pdf]

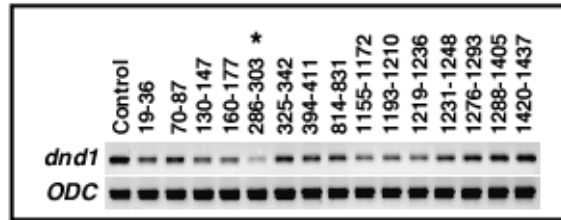

**Fig. S1. Selection of antisense oligos for depletion of maternal *dnd1*.** RT-PCR showing the effects of AS-oligos (10 ng) injection on the stability of endogenous *dnd1* mRNA in oocytes.

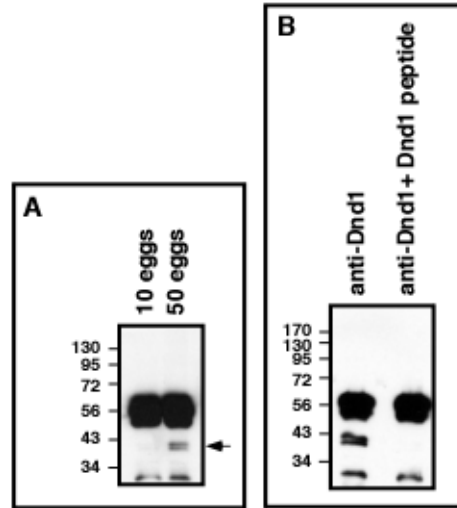

**Fig. S2. Specificity of anti-Dnd1 antibody.** (A) Western blot showing detection of the endogenous Dnd1 by the affinity-purified anti-Dnd1 antibody. Endogenous Dnd1 was enriched by immunoprecipitation from 10 and 50 eggs, respectively. Immunoprecipitation samples were separated on 10% SDS-PAGE and probed with the anti-Dnd1 antibody. (B) Western blot showing that endogenous Dnd1 was detected by anti-Dnd1 antibody, but not by the antibody that had been pre-absorbed with the Dnd1 peptide.

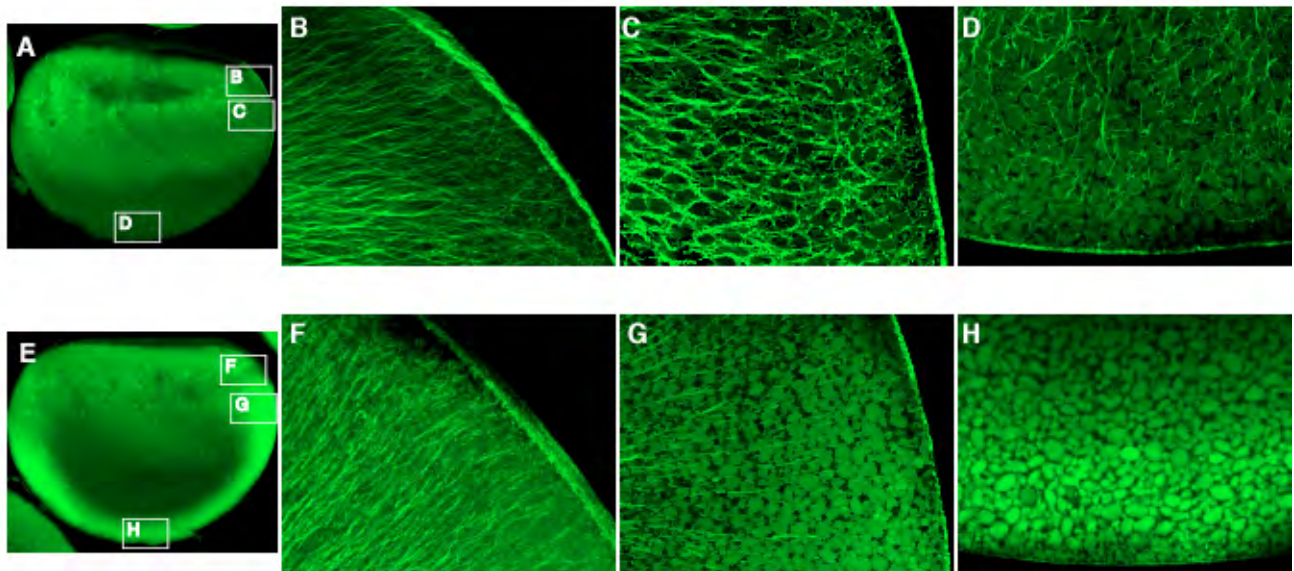

**Fig. S3. Microtubule formation.** Confocal images showing microtubule formation in control (A-D) and Dnd1 depleted (E-H) embryos. Embryos were harvested at 40 minutes post-fertilization. B-D and F-H are higher magnification views of the boxed areas in A and E, respectively.

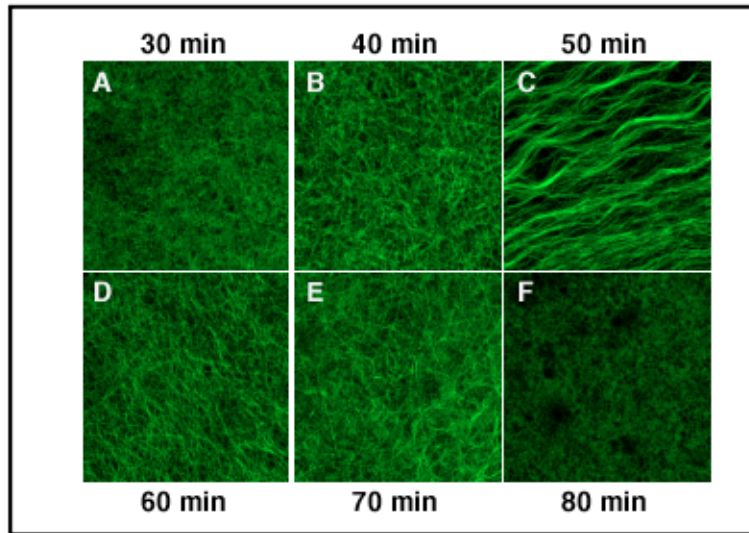

**Fig. S4. Vegetal cortical microtubule dynamics in artificially activated eggs.** Oocytes were treated with progesterone to induce maturation. After GVBD, eggs were pricked with a glass needle. Activated eggs were harvested at 30 (A), 40 (B), 50 (C), 60 (D), 70 (E) and 80 (F) minutes post-pricking, and stained with an anti-Tubulin antibodies. The formation of vegetal cortical microtubules was assessed by confocal microscopy.

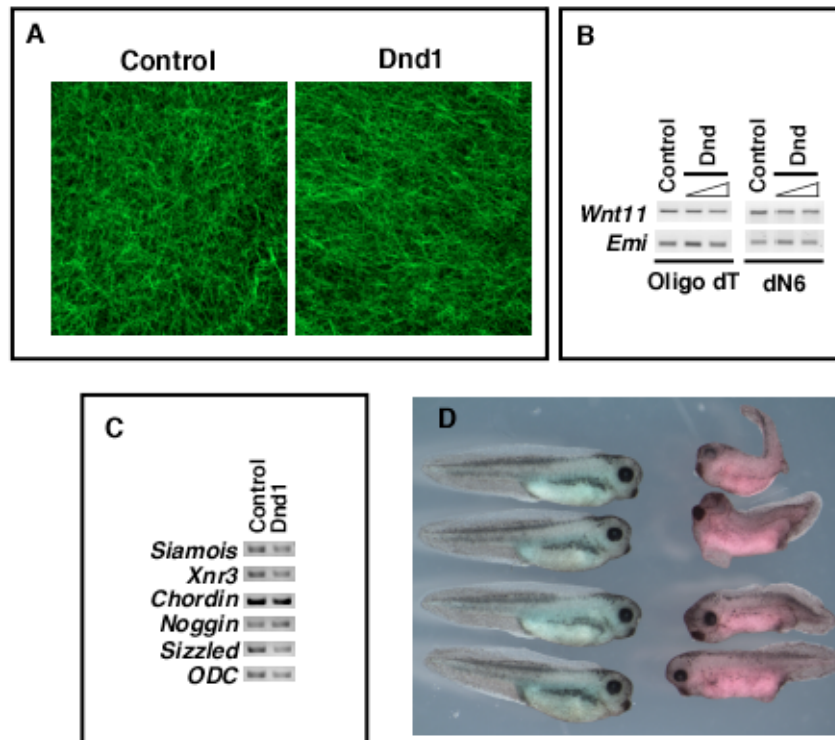

**Fig. S5. Effects of Dnd1 overexpression.** (A) Confocal images showing the formation of vegetal cortical microtubules in control and *dnd1* (500 pg) overexpressed host-transfer embryos (45 minutes post-fertilization). (B) Effect of Dnd1 overexpression on *wnt11* polyadenylation. Total RNA from control and Dnd1 overexpressed embryos (eight-cell stage) was reverse transcribed with oligo dT (left) and random hexamers (dN6, right). Oligo dT- and random-primed cDNAs were used as templates for PCR with *wnt11* and *Emi1* primers. (C) RT-PCR showing that overexpression of *dnd1* (500 pg) had no detectable effect on the expression of dorsal genes. *dnd1* RNA was injected into oocytes, allowed to translate and these oocytes were used for host transfer. Resulting embryos were harvested at stage 10.5 and analyzed for expression of *noggin*, *chordin*, *Xnr3*, *siamois* and *sizzled*. (D) Morphology of control (blue) and Dnd1-overexpressed host-transfer embryos (red).

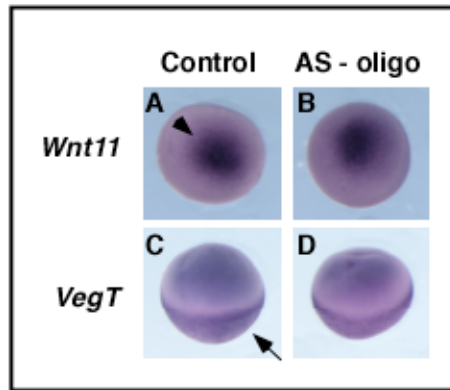

**Fig. S6. Knockdown of maternal Dnd1 had no effect on vegetal localization of *wnt11* or *VegT*.** (A-D) Whole-mount in situ hybridization showing the expression of *wnt11* (A,B) and *VegT* (C,D) in control (A,C) and AS-oligo injected (B,D) eggs. A and B are vegetal views. C and D are lateral views.
